# Supplementary material for: Noise as a risk factor in the delivery room: A clinical study
Source: PubMed Central journal article supplement (PMC6716652; doi:10.1371/journal.pone.0221860), 2019-08-30
Supplement: pone.0221860.s001.pdf [file pone.0221860.s001.pdf]

**S1 Table: Description of items in AOTP**

| <b>Category/Item</b>                 | <b>Excellent team performance</b>                                                                                                                                                                                                  |
|--------------------------------------|------------------------------------------------------------------------------------------------------------------------------------------------------------------------------------------------------------------------------------|
| <b>1. Communication with patient</b> |                                                                                                                                                                                                                                    |
| 1.1 Information sharing              | <i>Introduction and role identification by team members as they enter the room; address patient/partner directly; team continues to update patient.</i>                                                                            |
| 1.2 Reassuring attitude              | <i>At least one team member assumes the responsibility to continuously reassure the patient/partner.</i>                                                                                                                           |
| 1.3 Partner management escalation.   | <i>Team anticipates disruptive behavior and intervenes early to prevent escalation.</i>                                                                                                                                            |
| <b>2. Task/Case management</b>       |                                                                                                                                                                                                                                    |
| 2.1 Plan of action                   | <i>Explicit urgency of situation identified; differential diagnosis developed and plan of action shared with team members; patient well prepared for procedures; team member's verify readiness to proceed with interventions.</i> |
| 2.2 Resources utilization resources. | <i>People and equipment used effectively; efficient method of acquiring resources.</i>                                                                                                                                             |
| 2.3 Problem solving                  | <i>Team adapts to situation; timely recognition of problem; continuous attempt to resolve problem.</i>                                                                                                                             |
| <b>3. Teamwork</b>                   |                                                                                                                                                                                                                                    |
| 3.1 Leadership                       | <i>Leader identified; constructive style of leadership that encourages participation and team success; leader engages team members for improvement.</i>                                                                            |
| 3.2 Role assignment                  | <i>Roles and responsibilities of team members clear, quickly establish roles.</i>                                                                                                                                                  |
| 3.3 Team interaction                 | <i>Trust and respect demonstrated by all team members; flattened hierarchy encourages contribution of opinions; team members monitor and provide feedback on each other's performance; team members openly accept help.</i>        |

#### **4. Situation awareness**

- 4.1 Anticipation *Early recognition of impending problem; preemptive actions taken (e.g. call for blood, call for extra help).*
- 4.2 Realizing limitations *Team members acknowledge need for help; early call for help; extra personnel summoned in a timely fashion; early recognition of limitations related to knowledge; skills and ability.*
- 4.3 Avoiding fixation *Consider the global situation.*
- 4.4 Responsiveness *Rapid response to critical situation.*
- 4.5 Vigilance *Team members alert to clinical situation.*

#### **5. Team communication**

- 5.1 Focused communication *Clear questions/requests for action directed to a specific person identified by name; instructions given in clear voice which can be easily heard; orderly communication. Sender / receiver acknowledges that*
- 5.2 Closing the loop *message has been received; team members repeat what is being asked of them to ensure that correct actions are taking place; sender requests confirmation when actions are complete; confirmation provided when requested actions are completed.*

#### **6. Environment of the room**

- 6.1 Management of disruption *Dialogue focused on clinical situation; no conversations about personal issues; disruptive behaviors (e.g. yelling, rudeness to team members) dealt with efficiently to regain focus on clinical situation.*
- 6.2 Atmosphere in the room *Voices remain calm allowing focus on care; calm with voice and body language; controlled demeanor; orderly and controlled environment.*

---

Note. Descriptions of excellent performance are from the Handbook of Assessment of Obstetric Team performance.<sup>20</sup>
